# Supplementary material for: Experimental Tests for Measuring Individual Attentional Characteristics in Songbirds
Source: MDPI journal article supplement (doi:10.3390/ani11082233), 2021-07-29
Supplement: s1 [file s1]

**Table S1:** Occurrences of glances and gazes during all attentional tests. Wilcoxon signed-rank test and N=10 for each test. (**X** = Mean; **S.E.** = Standard Error; **C.V.** = Coefficient of variation). SVAT = Social Visual Attention Test, VAT= Visual Attention Test, AAT = Auditory Attention Test. Mono=monocular, Bino= binocular, Stim= stimulus

| Visual Attention        |                   |          |                   |                   |      |         |         |        |                   | Auditory Attention         |                   |          |       |         |        |    |
|-------------------------|-------------------|----------|-------------------|-------------------|------|---------|---------|--------|-------------------|----------------------------|-------------------|----------|-------|---------|--------|----|
| S.V.A.T.                |                   |          |                   |                   |      |         |         |        |                   | A.A.T conspecific stim     |                   |          |       |         |        |    |
| Social<br>Attention     | Glance            |          |                   | Gaze              |      | T       | p-value | Sign   |                   |                            |                   |          | T     | p-value | Sign   |    |
|                         | $\bar{X}\pm S.E.$ | C.V.     |                   | $\bar{X}\pm S.E.$ | C.V. |         |         |        |                   |                            |                   |          |       |         |        |    |
|                         | Max.              | 31.1±4   | 43                | 4.3±0.9           | 70.2 | 0       | =0.006  | **     | Before Stim       |                            | After Stim        |          |       |         |        |    |
|                         | Min.              | 16.2±3.1 | 62                | 6.1±1.5           | 70.2 | 3.5     | =0.01   | *      | $\bar{X}\pm S.E.$ | C.V.                       | $\bar{X}\pm S.E.$ | C.V.     |       |         |        |    |
|                         | Mono.             |          | Bino.             |                   | T    | p-value | Sign    | Glance | 42.7±4.9          | 38.1                       | 40.3±5.5          | 36.4     | 11    | +0.09   | NS     |    |
|                         | $\bar{X}\pm S.E.$ | C.V.     | $\bar{X}\pm S.E.$ | C.V.              |      |         |         |        | Gaze              | 6.1±1.9                    | 103.8             | 23.7±2.0 | 27.5  | 0       | 0.006  | ** |
|                         | Glance            | 19.2±2.8 | 46.2              | 11.8±1.9          | 52.2 | 8       | =0.04   | *      |                   |                            |                   |          |       |         |        |    |
| Gaze                    | 3.9±1             | 82.4     | 0.4±0.2           | 174.8             | 8    | =0.04   | *       |        |                   |                            |                   |          |       |         |        |    |
| V.A.T.                  |                   |          |                   |                   |      |         |         |        |                   | A.A.T. heterospecific stim |                   |          |       |         |        |    |
| Non-Social<br>Attention | Before Stim       |          |                   | During Stim       |      | T       | p-value | Sign   |                   |                            |                   |          | T     | p-value | Sign   |    |
|                         | $\bar{X}\pm S.E.$ | C.V.     |                   | $\bar{X}\pm S.E.$ | C.V. |         |         |        |                   |                            |                   |          |       |         |        |    |
|                         | Glance            | 63.8±11  | 57.2              | 75.1±7.8          | 34.6 | 15      | =0.2    | NS     | Glance            | 46.7±2.6                   | 18.5              | 74.5±4.7 | 21.02 | 1       | =0.007 | ** |
|                         | Gaze              | 16.5±4.1 | 83.1              | 33.6±5.9          | 58.7 | 5       | =0.02   | *      | Gaze              | 6±1.8                      | 98.4              | 8±2.8    | 114.4 | 24      | =.7    | NS |
