# Supplementary material for: Experimental Tests for Measuring Individual Attentional Characteristics in Songbirds
Source: MDPI journal article supplement (doi:10.3390/ani11082233), 2021-07-29
Supplement: s1 [file s1]

**Table S2:** Total gaze duration (s) during the attention tests. Wilcoxon signed-rank test and N=10 for each test. ( $\bar{X}$  = Mean; **S.E.** = Standard Error; **C.V.** = Coefficient of variation); SVAT = Social Visual Attention Test, VAT= Visual Attention Test, AAT = Auditory Attention Test.

| Social<br>Attention     | Visual Attention  |         |                   |      |       |         |          |                            | Auditory Attention     |                   |      |        |         |          |       |          |       |    |      |    |
|-------------------------|-------------------|---------|-------------------|------|-------|---------|----------|----------------------------|------------------------|-------------------|------|--------|---------|----------|-------|----------|-------|----|------|----|
|                         | S.V.A.T.          |         |                   |      |       |         |          |                            | A.A.T conspecific stim |                   |      |        |         |          |       |          |       |    |      |    |
|                         | Max.              |         | Min.              |      | T     | p-value | Sign     | Before Stim                |                        | After Stim        |      | T      | p-value | Sign     |       |          |       |    |      |    |
|                         | $\bar{X}\pm S.E.$ | C.V.    | $\bar{X}\pm S.E.$ | C.V. |       |         |          | $\bar{X}\pm S.E.$          | C.V.                   | $\bar{X}\pm S.E.$ | C.V. |        |         |          |       |          |       |    |      |    |
|                         | 9.6±2.2           | 78      | 13.1±3.6          | 90.4 | 12    | =0.2    | NS       | 19.9±6.9                   | 114.4                  | 84.3±10.1         | 39.7 | 0      | =0.006  | **       |       |          |       |    |      |    |
| Non-Social<br>Attention | Mono.             |         | Bino.             |      | T     | p-value | Sign     | A.A.T. heterospecific stim |                        |                   |      |        |         |          |       |          |       |    |      |    |
|                         | $\bar{X}\pm S.E.$ | C.V.    | $\bar{X}\pm S.E.$ | C.V. |       |         |          | Before Stim                |                        | After Stim        |      | T      | p-value | Sign     |       |          |       |    |      |    |
|                         | $\bar{X}\pm S.E.$ | C.V.    | $\bar{X}\pm S.E.$ | C.V. |       |         |          | $\bar{X}\pm S.E.$          | C.V.                   | $\bar{X}\pm S.E.$ | C.V. |        |         |          |       |          |       |    |      |    |
| 8.8±2.5                 | 88.3              | 0.8±0.4 | 174.8             | 4    | =0.02 | *       | 15.5±4.9 | 104                        | 53±9.9                 | 61.7              | 1    | =0.007 | **      | 15.5±5.6 | 122.3 | 23.7±8.6 | 120.9 | 23 | =0.6 | NS |
